# Supplementary material for: The Listeria Small RNA Rli27 Regulates a Cell Wall Protein inside Eukaryotic Cells by Targeting a Long 5′-UTR Variant
Source: PubMed Central journal article supplement (PMC4214639; doi:10.1371/journal.pgen.1004765), 2014-10-30
Supplement: pgen.1004765.s010.pdf [file pgen.1004765.s010.pdf]

**Table S1.** *Listeria monocytogenes* strains used in this study

| Species / strain | Relevant genotype                                   | Source or reference |
|------------------|-----------------------------------------------------|---------------------|
| EGD-e            | wild-type                                           | [1]                 |
| MD3409           | EGD-e / pP1                                         | This work           |
| MD3441           | EGD-e / pP1:: <i>rli27</i>                          | This work           |
| MD3443           | $\Delta$ <i>rli27</i>                               | This work           |
| MD3444           | $\Delta$ <i>rli27C2T</i>                            | This work           |
| MD3460           | $\Delta$ <i>rli27</i> / pP1                         | This work           |
| MD3461           | $\Delta$ <i>rli27C2T</i> / pP1                      | This work           |
| MD3457           | $\Delta$ <i>rli27</i> / pP1:: <i>rli27</i>          | This work           |
| MD2356           | $\Delta$ <i>rli27C2T</i> / pP1:: <i>rli27-mut1</i>  | This work           |
| MD2361           | $\Delta$ <i>rli27C2T</i> / pP1:: <i>rli27-mut3</i>  | This work           |
| MD2366           | $\Delta$ 5'-UTR <i>lmo0514</i>                      | This work           |
| MD2358           | 5'-UTR- <i>lmo0514-mut1</i>                         | This work           |
| MD2359           | 5'-UTR- <i>lmo0514-mut3</i>                         | This work           |
| MD2360           | 5'-UTR <i>lmo0514-mut1</i> / pP1- <i>rli27-mut1</i> | This work           |
| MD2365           | 5'-UTR <i>lmo0514-mut3</i> / pP1- <i>rli27-mut3</i> | This work           |
| MD3449           | $\Delta$ <i>lmo0411</i>                             | This work           |
| MD3402           | $\Delta$ <i>lmo0412</i>                             | [2]                 |
| MD2302           | $\Delta$ <i>lmo0514</i>                             | Trinad Chakraborty  |

1. Glaser P, Frangeul L, Buchrieser C, Rusniok C, Amend A, et al. (2001) Comparative genomics of *Listeria* species. *Science* 294: 849-852.
2. Quereda JJ, Pucciarelli MG (2014) Deletion of the membrane protein *Lmo0412* increases the virulence of *Listeria monocytogenes*. *Microbes Infect.* doi 10.1016/j.micinf.2014.07.002
