# Supplementary material for: The Listeria Small RNA Rli27 Regulates a Cell Wall Protein inside Eukaryotic Cells by Targeting a Long 5′-UTR Variant
Source: PubMed Central journal article supplement (PMC4214639; doi:10.1371/journal.pgen.1004765), 2014-10-30
Supplement: pgen.1004765.s011.pdf [file pgen.1004765.s011.pdf]

**Table S2.** Oligonucleotide primers used in this study

| Name/number         | Sequence (5'-3') *                                                      | Use                                                                                                           |
|---------------------|-------------------------------------------------------------------------|---------------------------------------------------------------------------------------------------------------|
| Lmorli27-A          | CGCGGATCCCGGAGAAAGTTGATAATACACCTG                                       | Amplification of ~500 bp fragment in 3' flanking region of <i>rli27</i>                                       |
| Lmorli27-B          | AAAAGGCCTCAAATAGAAAAGCAAATTTCTCA                                        | Amplification of ~500 bp fragment in 3' flanking region of <i>rli27</i>                                       |
| Lmorli27-C          | AAAAGGCCTGCAATCCCTATTTTAATTATACAATAAGTAG                                | Amplification of ~500 bp fragment in 5' flanking region of <i>rli27</i>                                       |
| Lmorli27-D          | CCGGAATTCCGAAGCCCAACACATACTGA                                           | Amplification of ~500 bp fragment in 5' flanking region of <i>rli27</i>                                       |
| Lmorli27-C2-term    | AAAAGGCCTAAAAGGCCATCCGTCAGGATGGCCTTCTACTTATTTA<br>AAGCAATCCCTATTTT      | Amplification of ~500 bp fragment in 5' flanking region of <i>rli27</i> to introduce an artificial terminator |
| Lmorli27 test-F2    | GGTTCGCTTGTAAGCCTCTG                                                    | Verification of the $\Delta rli27$ deletion (mapping in flanking region)                                      |
| Lmorli27 test-R2    | CACCGCTACTGGCAAAGAT                                                     | Verification of the $\Delta rli27$ deletion (mapping in flanking region)                                      |
| Lmorli27-pP1-F      | CGAGCTCAGGGATTGCTTTAAATAAGTATATTTT                                      | Cloning of <i>rli27</i> for overexpression and complementation assays                                         |
| Lmorli27-pP1-R      | ACATGCATGCAAAAATAAAGCAAATTTCTGTGCATGAG                                  | Cloning of <i>rli27</i> for overexpression and complementation assays                                         |
| Lmorli27-pP1-F-mut1 | CGAGCTCAGGGATT <b>CGA</b> TAAATAAGTATATTTTAACGATATTATC                  | Cloning of a mutated version of <i>rli27</i> (mut-1) for overexpression and complementation assays            |
| Lmorli27-pP1-F-mut3 | CGAGCTCAGGGATT <b>CGAAATTTATTCATT</b> ATTTTAACGATATTATCTATCTA<br>AATTTA | Cloning of a mutated version of <i>rli27</i> (mut-3) for overexpression and complementation assays            |
| Lmorli27-F          | AAATTTACCACGAATCTAGCC                                                   | Verification of $\Delta rli27$ deletion (mapping in reading frame), qPCR and Northern Blot probe for Rli27    |
| Lmorli27-R          | GAAATTTTGCTTTTCTATTTGTT                                                 | Verification of $\Delta rli27$ deletion (mapping in reading frame) and qPCR                                   |
| Lmo0411-A           | CGCGGATCCGAGAAAAAAGCAGCTGAAGAAAA                                        | Amplification of ~500 bp fragment in 5' flanking region of <i>lmo0411</i>                                     |
| Lmo0411-B           | AAAAGGCCTGGCTGTATTTCTTGAACCTTTAG                                        | Amplification of ~500 bp fragment in 5' flanking region of <i>lmo0411</i>                                     |
| Lmo0411-C           | AAAAGGCCTTGTCGAAAATGCAACTACCG                                           | Amplification of ~500 bp fragment in 3' flanking region of <i>lmo0411</i>                                     |
| Lmo0411-D           | CCGGAATTCCGAAGTTGGCGGAACAAAATG                                          | Amplification of ~500 bp fragment in 3' flanking region of <i>lmo0411</i>                                     |
| Lmo0411 test-F      | AAGCAAAGGCACAAGGCTTA                                                    | Verification of the $\Delta lmo0411$ deletion (mapping in flanking region)                                    |
| Lmo0411 test-R      | TGGTATGACGCAGAAAGTTGG                                                   | Verification of the $\Delta lmo0411$ deletion (mapping in flanking region)                                    |
| Lmo0411-F           | CTTCGCAGGGCAACATGATA                                                    | Verification of the $\Delta lmo0411$ deletion (mapping in reading frame) and qPCR                             |
| Lmo0411-R           | ACTGGCATCGATAGAGAGGGATT                                                 | Verification of the $\Delta lmo0411$ deletion (mapping in reading frame) and qPCR                             |
| Lmo0514-A           | AGAGTTCATTAATTGTAAGTCCAGG                                               | Amplification of ~500 bp fragment in 5' flanking region of <i>lmo0514</i>                                     |
| Lmo0514-B           | TTATACTCTCCTTAGTGGTTAATT                                                | Amplification of ~500 bp fragment in 5' flanking region of <i>lmo0514</i>                                     |
| Lmo0514-C           | ATTATTGTGAATTCATTAGCAAAAA                                               | Amplification of ~500 bp fragment in 3' flanking region of <i>lmo0514</i>                                     |
| Lmo0514-D           | CGCTTTTTTATCTAGCTATTAAG                                                 | Amplification of ~500 bp fragment in 3' flanking region of <i>lmo0514</i>                                     |

|                      |                                                              |                                                                                                                           |
|----------------------|--------------------------------------------------------------|---------------------------------------------------------------------------------------------------------------------------|
| Δ0514_P2_A           | CGCGGATCCGCGTCACTTCACTTCCGTTG                                | Amplification of ~500 bp fragment (fragment A-B) for generation of Δ5'-UTR <i>lmo0514</i> deletion in chromosome          |
| Δ0514_P2_B           | AAAAGGCCTAAGGCAAATCAAACGTGAAA                                | Amplification of ~500 bp fragment (fragment A-B) for generation of Δ5'-UTR <i>lmo0514</i> deletion in chromosome          |
| Δ0514_P2_C           | AAAAGGCCTTCTTCTTAATAATGCGAAAAAG                              | Amplification of ~500 bp fragment (fragment C-D) for generation of Δ5'-UTR <i>lmo0514</i> deletion in chromosome          |
| Δ0514_P2_D           | CCGGAATTCTATAAAAGCGGCACCTGGTC                                | Amplification of ~500 bp fragment (fragment C-D) for generation of Δ5'-UTR <i>lmo0514</i> deletion in chromosome          |
| Lmo0514 test-F       | AAAAAGCGCTACCATTGCTT                                         | Verification of the Δ <i>lmo0514</i> deletion (mapping in flanking region)                                                |
| Lmo0514 test-R       | CAATTCCAAGCACACCGTCT                                         | Verification of the Δ <i>lmo0514</i> deletion (mapping in flanking region)                                                |
| Lmo0514-F            | TGCTGCAGGACTCAAAGCAA                                         | Verification of the Δ <i>lmo0514</i> deletion (mapping in reading frame), qPCR and Northern Blot probe for <i>lmo0514</i> |
| Lmo0514-R            | TGTCCACTGTGCTTGTAGTCA                                        | Verification of the Δ <i>lmo0514</i> deletion (mapping in reading frame) and qPCR                                         |
| Δ0514_comp_A         | CGCGGATCCGCATCACTTGCTTGCTGAG                                 | Generation of mut-1 and mut-3 chromosomal mutations in 5'-UTR of <i>lmo0514</i>                                           |
| Δ0514_comp_D         | CCGGAATTCTTCATGTTTGCTCATTGTCA                                | Generation of mut-1 and mut-3 chromosomal mutations in 5'-UTR of <i>lmo0514</i>                                           |
| Mut0514pXG_1-overlap | AGGAATCCGATTAAATAAGCAATGGTAGCGCTTTTTGTCTAAATA<br>AAA         | Generation of mut-1 chromosomal mutation in 5'-UTR of <i>lmo0514</i>                                                      |
| Mut0514pXG_2-overlap | CATTGCTTATTTAATCGGATTCTATAAAAATAAGAGTGAATAATA<br>TGAATATTAAG | Generation of mut-1 chromosomal mutation in 5'-UTR of <i>lmo0514</i>                                                      |
| Mut0514pXG_5-overlap | AGGAATCCGAAATTTATTCGTATGGTAGCGCTTTTTGTCTAAATA<br>AAA         | Generation of mut-3 chromosomal mutation in 5'-UTR of <i>lmo0514</i>                                                      |
| Mut0514pXG_6-overlap | CATACGAATAAATTCGGATTCTATAAAAATAAGAGTGAATAAT<br>ATGAATATTAAG  | Generation of mut-3 chromosomal mutation in 5'-UTR of <i>lmo0514</i>                                                      |
| UTR-A                | GAGAGTTAGTTTTAACGCGTTATAC                                    | RT-PCR for <i>lmo0514</i> untranslated region                                                                             |
| UTR-B                | TCTTTTATTAGACAAAAAGCGC                                       | RT-PCR for <i>lmo0514</i> untranslated region                                                                             |
| UTR-1R               | TGAGCTGCTGTGGAAGGATATA                                       | RT-PCR for <i>lmo0514</i> untranslated region                                                                             |
| 0515-R               | CATTTGGAGAAAAGGCACGTA                                        | RT-PCR for <i>lmo0514-lmo0515 operon</i>                                                                                  |
| Lmo16S rRNA-F        | CACACTGGGACTGAGACACG                                         | RT-PCR and qPCR                                                                                                           |
| Lmo16S rRNA-R        | CCGTCAGACTTTCGTCCATT                                         | RT-PCR and qPCR                                                                                                           |
| Utr0514_qPCR_F       | AAAAAGCGCTACCATTGCTT                                         | qPCR for <i>lmo0514</i> 5' untranslated region                                                                            |
| Utr0514_qPCR_R       | TTTCACGTTTGATTGCCTTA                                         | qPCR for <i>lmo0514</i> 5' untranslated region                                                                            |
| RNA adapter          | GCUGAUGGCGAUGAAUGAACACUGCGUUUGCUGGCUUUGAUG<br>AAA            | 5' RACE: RNA ligation to RNA oligo                                                                                        |
| RaceIN               | CGCGGATCCGAACACTGCGTTTGCTGGCTTTGATG                          | 5' RACE                                                                                                                   |

|                    |                                                                                       |                                                                                    |
|--------------------|---------------------------------------------------------------------------------------|------------------------------------------------------------------------------------|
| lmo0514-PE-1rv     | AGAAATAGTTTCAGTGCTTTTTTCAT                                                            | 5'RACE                                                                             |
| lmo0514-PE-3rv     | TGAGCTGCTGTGGAAGGATATA                                                                | 5'RACE                                                                             |
| lmo0514-PE-6rv     | CACTCTTATTTTATAGGAATCGCTTT                                                            | 5'RACE                                                                             |
| T7-rv-rli27        | TAATACGACTCACTATAGGGGAAATTTGCTTTTCTATTTGTT                                            | Northern Blot probe for Rli27                                                      |
| 5S rRNA-F          | TATGGCGAGAAGGTCACACC                                                                  | Northern Blot probe for 5S rRNA                                                    |
| T7-5S-rRNA-R       | TAATACGACTCACTATAGGGAACTACCATTGGCGCAGAGA                                              | Northern Blot probe for 5S rRNA                                                    |
| T7-Lmo0514-R       | TAATACGACTCACTATAGGGGTGCCACTGTCGCTTGTAGTCA                                            | Northern Blot probe for <i>lmo0514</i>                                             |
| 16S-northern-F1    | TTAGCTAGTTGGTAGGGT                                                                    | Northern Blot probe for 16s                                                        |
| T7-16S-northern-R1 | TAATACGACTCACTATAGGGAAATCCGGACAACGCTTGC                                               | Northern Blot probe for 16s                                                        |
| EMSAT7-Rli27-WT-F  | TAATACGACTCACTATAGGGGAGGGATTGCTTTAAATAAGTATATTT<br>TAAC                               | In vitro transcription of Rli27 wild type for EMSA assay                           |
| EMSA-Rli27-WT-R    | ACGGCTGTGACAGTTGCTC                                                                   | In vitro transcription of Rli27 wild type and Rli27 <sup>mut3</sup> for EMSA assay |
| EMSAT7-Rli27F-Mut1 | TAATACGACTCACTATAGGGGAGGGATT <u>CG</u> ATTAAATAAGTATATT<br>TTAACGATATTATCTATC         |                                                                                    |
| EMSAT7-Rli27F-Mut3 | TAATACGACTCACTATAGGGGAGGGATT <u>CGAAATTTATTC</u> ATTATT<br>TAACGATATTATCTATCTAAATTTAC | In vitro transcription of Rli27 <sup>mut3</sup> for EMSA assay                     |
| EMSAT7-0514-WT-TSS | TAATACGACTCACTATAGGGATTGAAAACAGTTAATTGTGTAC                                           | In vitro transcription of <i>lmo0514</i> wild type for EMSA assay                  |
| EMSA-0514-WT-R     | AGTGGTTAATTTCTTCCCAAAGT                                                               | In vitro transcription of <i>lmo0514</i> wild type for EMSA assay                  |
| EMSAT7-5'sbrA-F    | TAATACGACTCACTATAGGAGTACATCTAGATCCATACCCCTAAA<br>C                                    | In vitro transcription of SbrA wild type for EMSA assay                            |
| EMSA-5'sbrA-R      | AAAAAGAGCAGCACCCGA                                                                    | In vitro transcription of SbrA wild type for EMSA assay                            |

\* Restriction sites underlined, artificial terminator in italics and underlined. Mutations introduced in Rli27 (cloned in pP1 vector) or in 5'UTR of lmo0514 indicated in blue.
